# Supplementary material
Source: Royal Society of Chemistry journal article supplement (doi:10.1039/d6ta00662k)
Supplement: d6ta00662k1.pdf [file d6ta00662k1.pdf]

23 **1. Figures and tables**

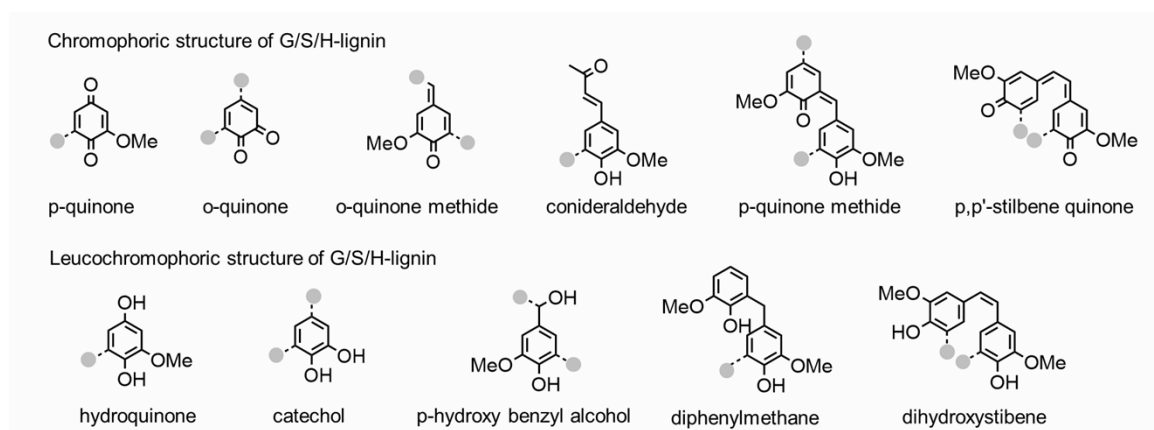

24

25 **Figure S1.** Major intrinsic chromophores in lignin are responsible for its native coloration.

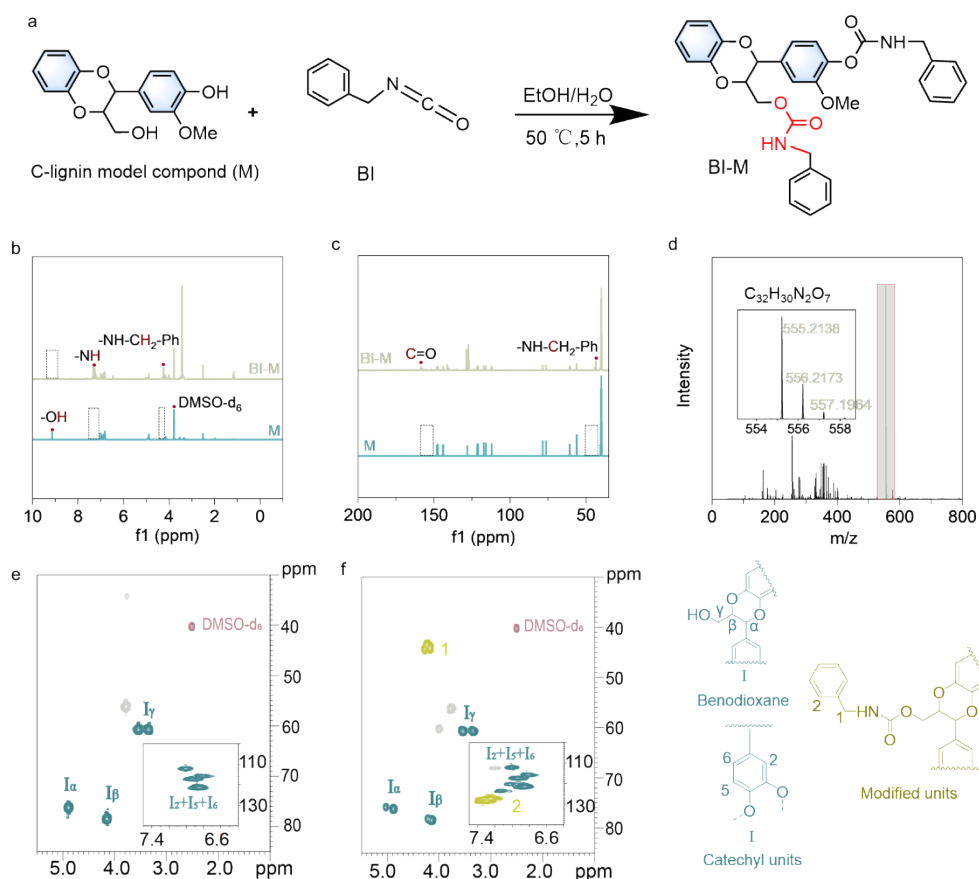

26

27 **Figure S2.** Structural confirmation of BI–M formation. a)scheme of reaction, b)<sup>1</sup>H NMR spectra,

28 c) <sup>13</sup>C NMR of M and BI–M in DMSO–d<sub>6</sub>, d) HRMS (ESI<sup>+</sup>) of BI–M showing the diagnostic [M+H]<sup>+</sup>

29 ion at m/z 555.2138 with the expected isotopic pattern. e-f) 2D HSQC spectra of M and BI–M

30

31

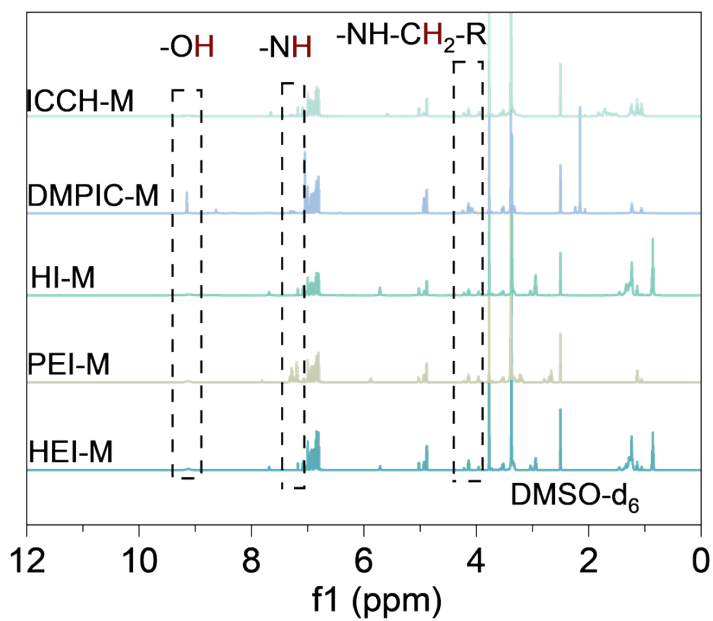

32

33 **Figure S3.**  $^1\text{H}$  NMR of M modified by HEI, PEI, HI, 2,6-DMPIC, and ICCH

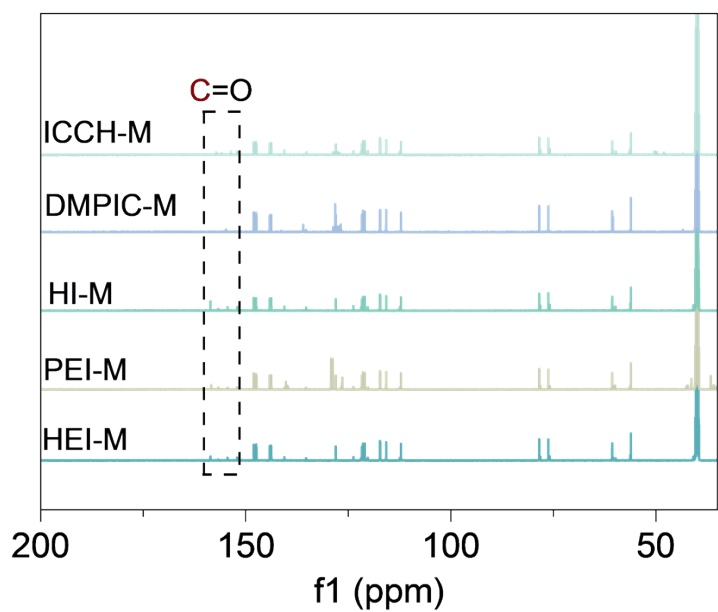

34

35 **Figure S4.**  $^{13}\text{C}$  NMR NMR spectrum of M by HEI, PEI, HI, 2,6-DMPIC, and ICCH

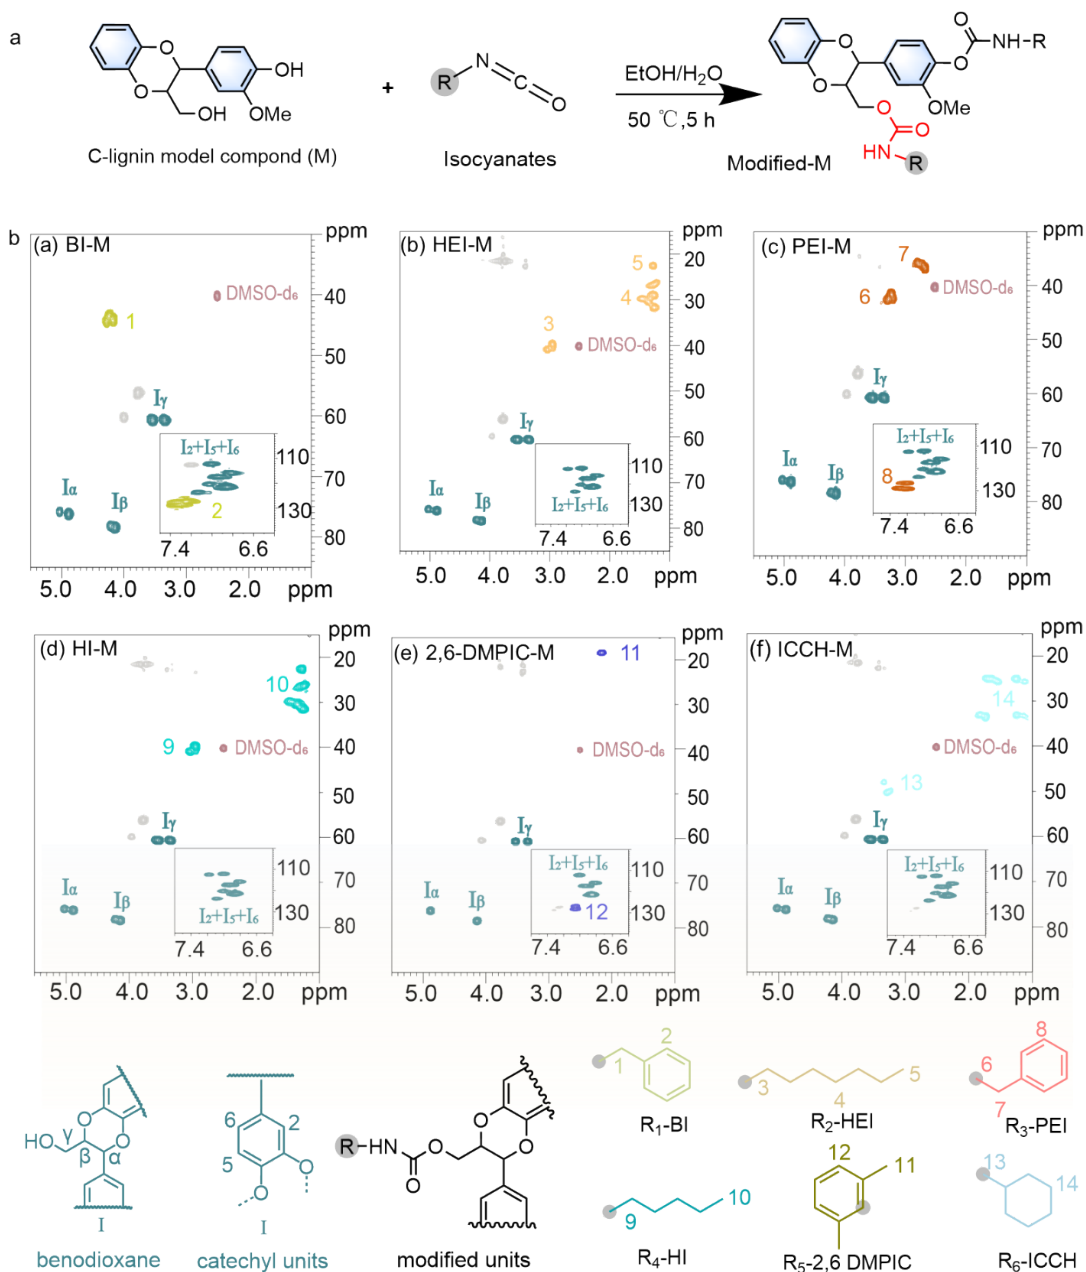

36

37

38 **Figure S5.** 2D HSQC NMR spectrum of M modified by (a) BI, (b) HEI, (c) PEI, (d) HI, (e) 2,6-

39 DMPIC, and (f) ICCH

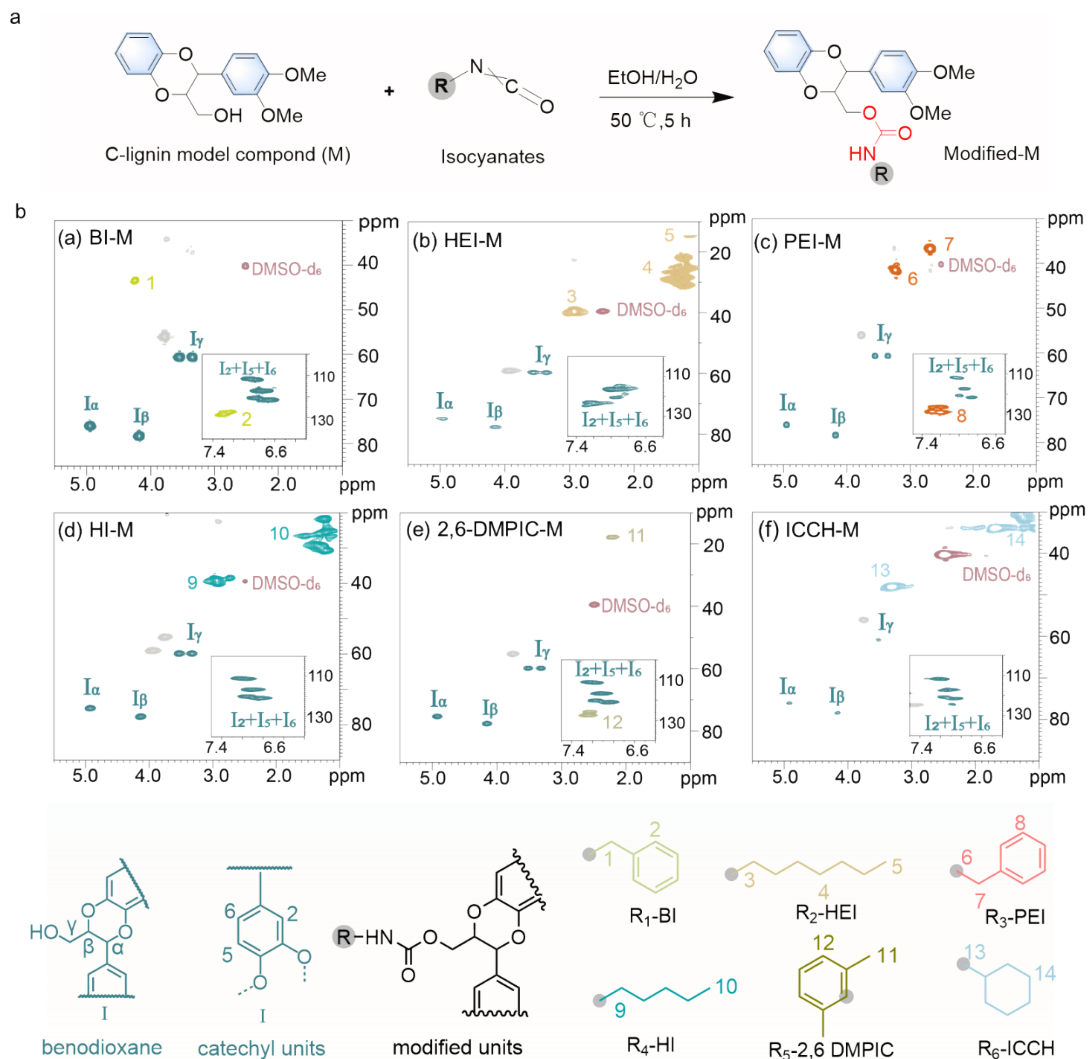

40

41

42 **Figure S6.** 2D HSQC NMR spectrum of M' modified by (a) BI, (b) HEI, (c) PEI, (d) HI, (e) 2,6-

43 DMPIC, and (f) ICCH

44

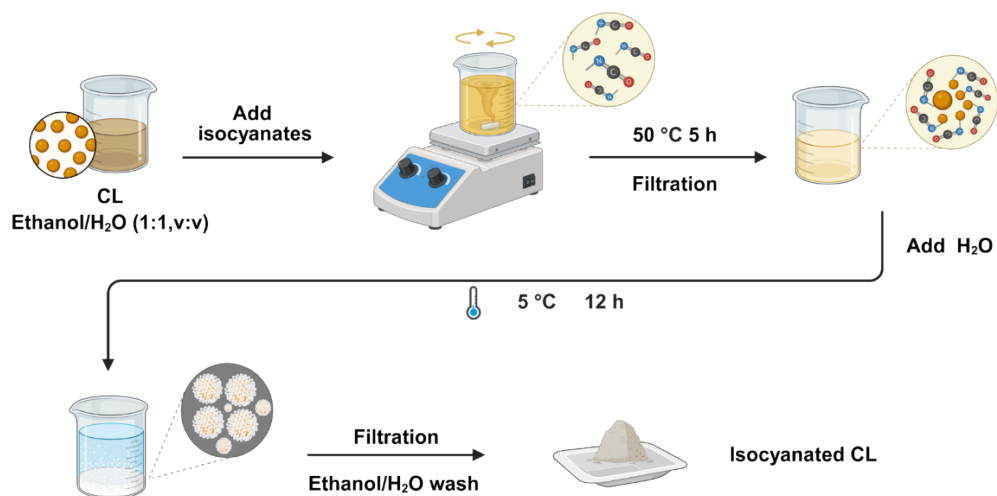

45

Fi

46 **Figure S7.** The process flowchart of CL modified by isocyanates.

47

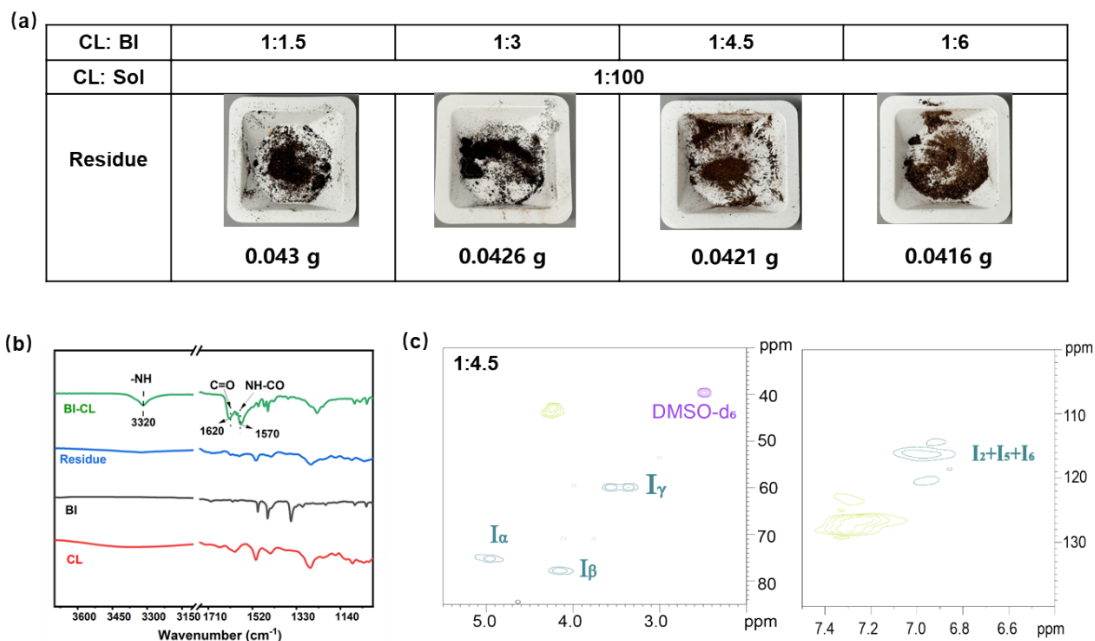

48

49 **Figure S8.** (a) The yield of residue under different conditions, (b) the FITR of CL, BI, residue, and  
50 BI-CL (1:4.5,1:100), and (c) 2D-HSQC of residue (1:4.5,1:100)

51

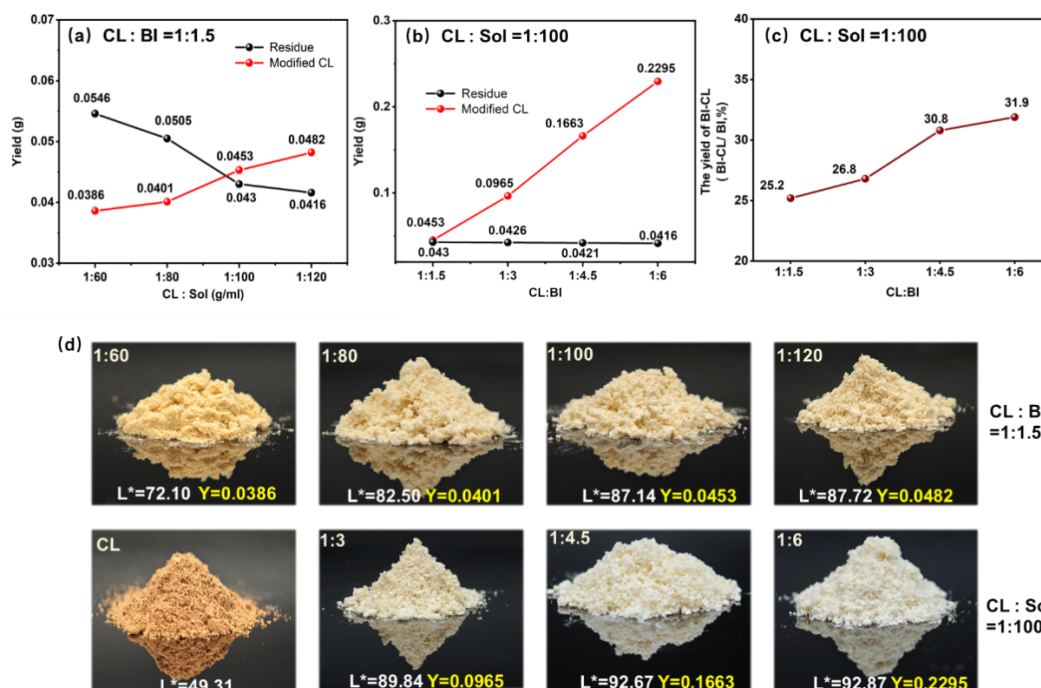

52

53 **Figure S9.** (a) The yield of products with different ratios of C-lignin (CL) to solvent at CL:  
54 BI=1:1.5, (b) the yield of products under different CL: BI ratio at CL: Sol = 1:100 (c) the yield of  
55 BI-CL (BI-CL/BI, %), and (d) the lightness (L\*) and yield (Y) of the samples.

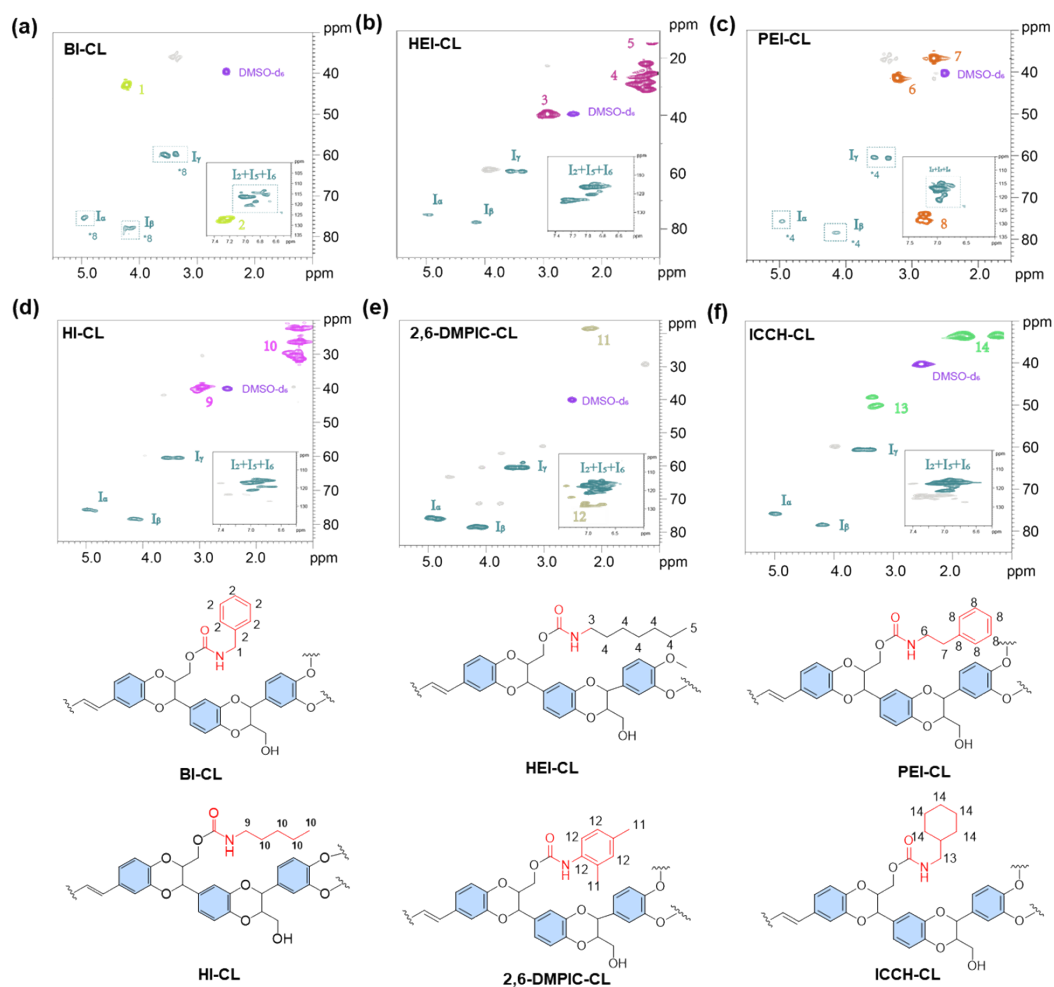

57

58 **Figure S10.** 2D HSQC NMR spectrum of CL modified by (a) BI, (b) HEI, (c) PEI, (d) HI, (e) 2,6-

59 DMPIC, (f) ICCH

60

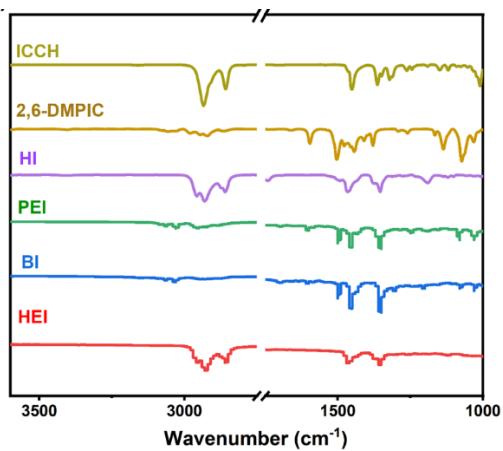

61

62 **Figure S11.** FTIR of (a) HEI, BI, PEI, HI, 2,6-DMPIC, and ICCH

63

64

65

66

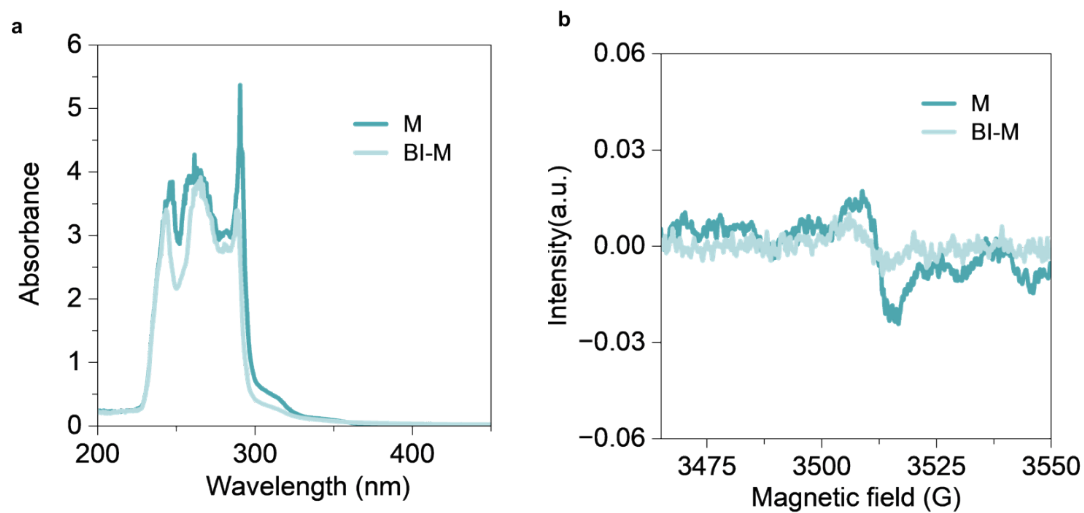

67

68 **Figure S12.** a) UV-vis and b) EPR spectra of M and BI-M recorded under identical  
69 conditions. BI-M exhibits a modest reduction in long-wavelength absorption and  
70 radical intensity relative to M.

71

72

73

74

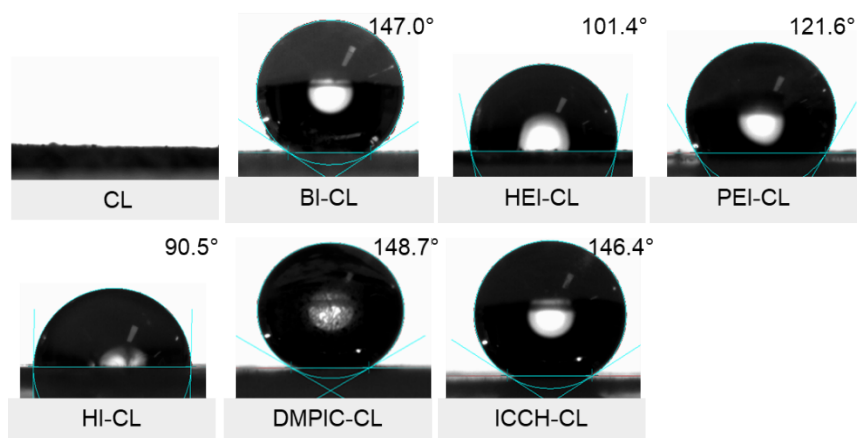

75

76 **Figure S13.** Water contact angel of CL, HEI-CL, BI-CL, PEI-CL, HI-CL, 2,6-DMPIC-CL, and  
77 ICCH-CL.

78

79

80

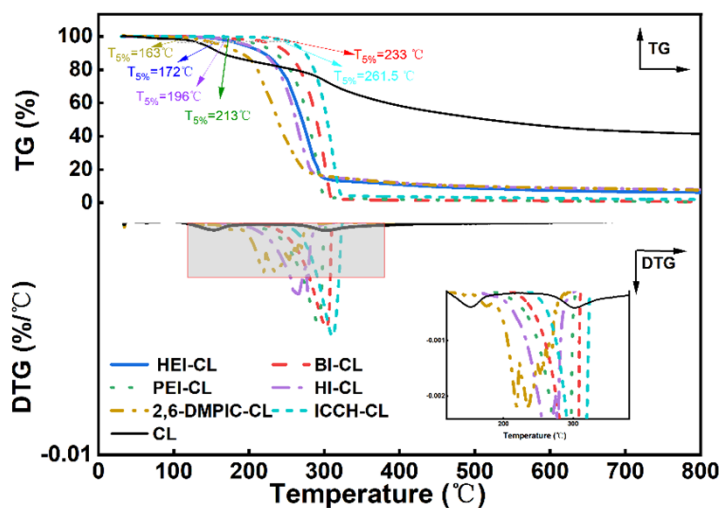

81  
 82 **Figure S14.** TG/DTG of CL, HEI-CL, BI-CL, PEI-CL, HI-CL, 2,6-DMPIC-CL, and ICCH-CL.  
 83  
 84  
 85  
 86  
 87

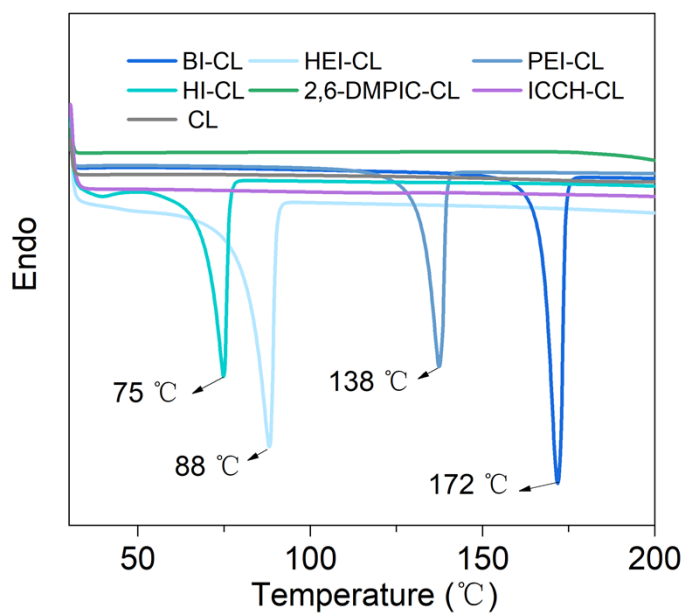

88  
 89 **Figure S15.** DSC of CL, HEI-CL, BI-CL, PEI-CL, HI-CL, 2,6-DMPIC-CL, and ICCH-CL

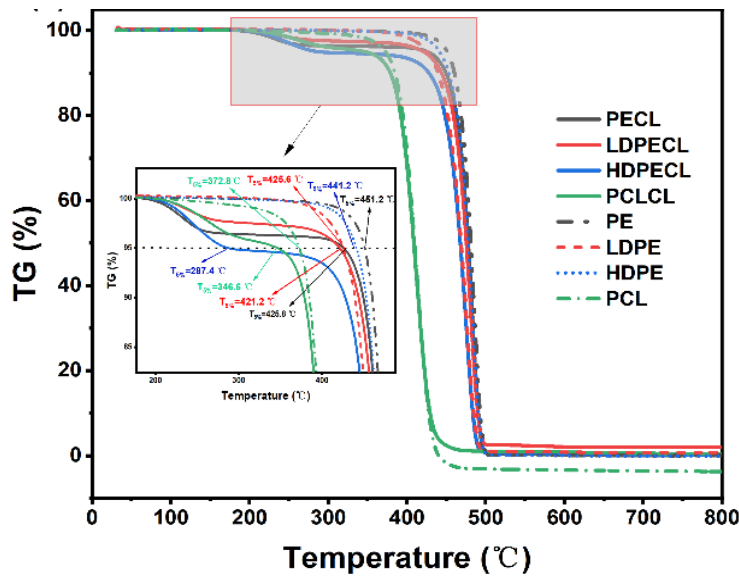

90

91 **Figure S16.** TG of corresponding films made by modified BI-CL mixing with different plastics and  
 92 plastics alone.

93

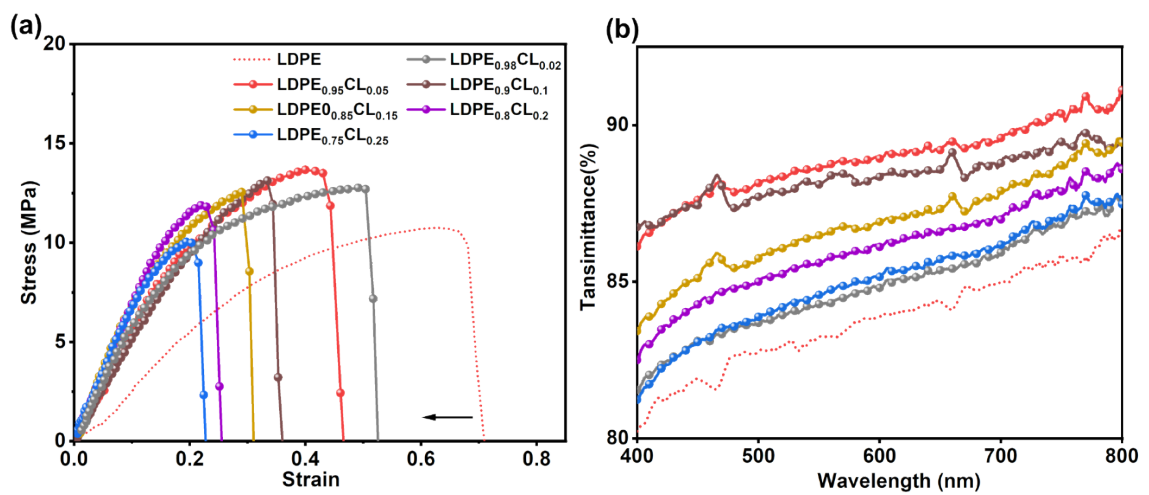

94

95 **Figure S17.** (a) The strain and stress curve of LDPE/BI-CL with different lignin content, and (b)  
 96 the transmittance of LDPE/BI-CL with different lignin content in the visible light region (400-  
 97 800 nm).

98

99

100

101 **Table S1.** NMR data for the signal assignments in C-lignin derivatives in DMSO-d<sub>6</sub>.

| Label                                        | $\delta_C/\delta_H$ (ppm)                      | Assignment                                                                                                               |
|----------------------------------------------|------------------------------------------------|--------------------------------------------------------------------------------------------------------------------------|
| I <sub><math>\alpha</math></sub>             | 75.4/4.83                                      | C <sub><math>\alpha</math></sub> -H <sub><math>\alpha</math></sub> in benzodioxane substructures (I)                     |
| I <sub><math>\beta</math></sub>              | 77.9/4.06                                      | C <sub><math>\beta</math></sub> -H <sub><math>\beta</math></sub> in benzodioxane substructures (I)                       |
| I <sub><math>\gamma</math></sub>             | 59.9/3.34-3.55                                 | C $\gamma$ -H $\gamma$ in benzodioxane substructures (I)                                                                 |
| I <sub>2, I<sub>5, I<sub>6</sub></sub></sub> | 115.8/6.77, 116.5/6.95, 118.6/6.70, 120.4/6.95 | C <sub>2</sub> -H <sub>2</sub> , C <sub>5</sub> -H <sub>5</sub> , C <sub>6</sub> -H <sub>6</sub> , in catechol units (I) |
| 1                                            | 45.1/4.23                                      | Benzyl group in $\gamma$ -isocyanate-functionalized benzodioxane substructures                                           |
| 2                                            | 126.7-128.5/7.27-7.31                          | Benzyl group in $\gamma$ -isocyanate-functionalized benzodioxane substructures                                           |
| 3                                            | 40.3/3.18                                      | Heptyl group in $\gamma$ -isocyanate-functionalized benzodioxane substructures                                           |
| 4                                            | 22.7-31.8/1.26-1.50                            | Heptyl group in $\gamma$ -isocyanate-functionalized benzodioxane substructures                                           |
| 5                                            | 14.1/0.88                                      | Heptyl group in $\gamma$ -isocyanate-functionalized benzodioxane substructures                                           |
| 6                                            | 39.9/3.03                                      | Phenethyl group in $\gamma$ -isocyanate-functionalized benzodioxane substructures                                        |
| 7                                            | 35.0/2.74                                      | Phenethyl group in $\gamma$ -isocyanate-functionalized benzodioxane substructures                                        |
| 8                                            | 125.9-128.6/7.19-7.25                          | Phenethyl group in $\gamma$ -isocyanate-functionalized benzodioxane substructures                                        |
| 9                                            | 40.3/3.18                                      | Hexyl group in $\gamma$ -isocyanate-functionalized benzodioxane substructures                                            |
| 10                                           | 14.1-29.6/0.88-1.50                            | Hexyl group in $\gamma$ -isocyanate-functionalized benzodioxane substructures                                            |
| 11                                           | 17.6-21.6/2.16-2.24                            | 2,6-Dimethylphenyl group in $\gamma$ -isocyanate-functionalized benzodioxane substructures                               |
| 12                                           | 126.2-143.4/6.95-7.15                          | 2,6-Dimethylphenyl group in $\gamma$ -isocyanate-functionalized benzodioxane substructures                               |
| 13                                           | 43.8/2.88                                      | Cyclohexyl group in $\gamma$ -isocyanate-functionalized benzodioxane substructures                                       |
| 14                                           | 25.5-37.8/1.46-1.62;1.38-1.44                  | Cyclohexyl group in $\gamma$ -isocyanate-functionalized benzodioxane substructures                                       |

102

103

104

105

106 **Table S2.** The yield of residue and modified CL by six isocyanates

| Modified CL  | Residue | Modified CL |
|--------------|---------|-------------|
| BI-CL        | 0.0421  | 0.167       |
| HEI-CL       | 0.0688  | 0.111       |
| PEI-CL       | 0.0285  | 0.154       |
| HI-CL        | 0.0327  | 0.163       |
| 2,6-DMPIC-CL | 0.078   | 0.117       |
| ICCH-CL      | 0.0241  | 0.158       |
| CL           | 0.0421  | 0.167       |

120 **Table S3.** The hydroxyl group contents of CL, BI-CL under different CL: BI ratios (millimoles per  
121 gram)

| CL: BI | Aliphatic-OH | -COOH | Catechol-OH |      |      | Total Catechol-OH | <b>Table S4.</b><br>The hydroxyl group contents of CL, HEI-CL, BI- |
|--------|--------------|-------|-------------|------|------|-------------------|--------------------------------------------------------------------|
|        |              |       | a           | b    | c    |                   |                                                                    |
| 1:1.5  | 0.64         | 0.30  | 0.09        | 0.06 | 0.04 | 0.19              |                                                                    |
| 1:3    | 0.53         | 0.39  | 0.01        | 0.08 | 0.08 | 0.17              |                                                                    |
| 1:4.5  | 0.30         | 0.01  | 0.01        | 0.05 | 0.02 | 0.08              |                                                                    |
| 1:6    | 0.28         | 0.38  | 0.02        | 0.08 | 0.28 | 0.38              |                                                                    |
| CL     | 8.36         | 0.26  | -           | 3.09 | 2.70 | 5.79              |                                                                    |

137 CL, PEI-CL, HI-CL, 2,6-DMPIC-CL, and ICCH-CL (millimoles per gram)

| Modified CL  | Aliphatic-OH | -COOH | Catechol-OH |      |      | Total Catechol-OH |
|--------------|--------------|-------|-------------|------|------|-------------------|
|              |              |       | a           | b    | c    |                   |
| HEI-CL       | 1.09         | 0.01  | 0.06        | 0.19 | 0.49 | 0.74              |
| BI-CL        | 0.30         | 0.01  | 0.02        | 0.08 | 0.28 | 0.08              |
| PEI-CL       | 0.48         | -     | 0.04        | 0.02 | 0.40 | 0.46              |
| HI-CL        | 0.53         | 0.10  | 0.33        | 0.28 | 0.09 | 0.70              |
| 2,6-DMPIC-CL | 1.48         | 0.15  | 0.47        | 0.05 | 0.14 | 0.66              |
| ICCH-CL      | 1.21         | 0.01  | 0.04        | 0.09 | 0.11 | 0.24              |
| CL           | 8.36         | 0.26  | -           | 3.09 | 2.70 | 5.79              |

139

140

141 **Table S5.** APC spectra of different CL samples

142

143

144

145

146

147

148

149

150

151

152

153

154

155

| Sample       | Product | M <sub>w</sub> (Daltons) | M <sub>n</sub> (Daltons) | PDI  |
|--------------|---------|--------------------------|--------------------------|------|
| CL           | -       | 3164                     | 2475                     | 1.28 |
| HEI-CL       | Residue | 3401                     | 3392                     | 1.20 |
|              | Product | 2799                     | 2463                     | 1.14 |
| BI-CL        | Residue | 4293                     | 3991                     | 1.18 |
|              | Product | 1817                     | 1756                     | 1.03 |
| PEI-CL       | Residue | 3818                     | 3715                     | 1.17 |
|              | Product | 2202                     | 2067                     | 1.07 |
| HI-CL        | Residue | 4036                     | 4153                     | 1.16 |
|              | Product | 2547                     | 2296                     | 1.11 |
| 2,6-DMPIC-CL | Residue | 3711                     | 3651                     | 1.21 |
|              | Product | 2361                     | 2157                     | 1.09 |
| ICCH-CL      | Residue | 3916                     | 3617                     | 1.27 |
|              | Product | 2751                     | 2255                     | 1.22 |

| Sample   | L*    | a*    | b*    | ΔE    |
|----------|-------|-------|-------|-------|
| Standard | 8.83  | -1.53 | 1.32  | -     |
| CL       | 49.31 | 6.79  | 17.22 | 43.40 |
| CL1.5BI  | 87.14 | 2.28  | 15.56 | 14.84 |
| CL3BI    | 89.84 | 1.39  | 7.88  | 7.25  |
| CL4.5BI  | 92.67 | 0.35  | 9.17  | 8.94  |
| CL6BI    | 92.87 | 1.03  | 7.76  | 8.02  |
| CLSol60  | 72.10 | 5.13  | 25.32 | 30.00 |
| CLSol80  | 82.50 | 3.28  | 17.81 | 18.31 |
| CLSol100 | 87.14 | 2.28  | 15.56 | 14.84 |

156

157

158 **Table S6.** The hydrophobicity of isocyanates

159

| Solvent   | XLogP3 | iLab2.0 | SILICOS-IT | MolSoft | ChemDraw | LogP |
|-----------|--------|---------|------------|---------|----------|------|
| 2,6-DMPIC | 4.06   | 4.12    | 3.94       | 4.18    | 3.98     | 4.08 |
| PEI       | 3.46   | 3.51    | 3.38       | 3.55    | 3.42     | 3.50 |
| HEI       | 3.48   | 3.52    | 3.61       | 3.45    | 3.39     | 3.49 |
| HI        | 3.01   | 3.03    | 3.11       | 2.98    | 2.95     | 3.02 |
| BI        | 2.78   | 2.84    | 2.92       | 2.81    | 2.73     | 2.81 |
| ICCH      | 2.71   | 2.78    | 2.85       | 2.69    | 2.66     | 2.74 |

160

161

162

163

164

165

|              |       |      |       |       |
|--------------|-------|------|-------|-------|
| CLSol120     | 87.72 | 1.92 | 14.36 | 13.53 |
| BI-CL        | 92.67 | 0.35 | 9.17  | 8.94  |
| HEI-CL       | 78.53 | 3.55 | 14.73 | 17.66 |
| PEI-CL       | 89.24 | 0.75 | 12.41 | 11.33 |
| HI-CL        | 75.49 | 4.43 | 29.38 | 31.64 |
| 2,6-DMPIC-CL | 71.68 | 5.30 | 18.80 | 25.42 |
| ICCH-CL      | 76.97 | 5.02 | 18.56 | 21.93 |

166 **Table S7.** L\* a\* b\*(CIELAB) color space of different CL derivatives

167

168

169

170

171

172

173

174

175

176

177

178

179

180

181

182

183

184

185

186

187

188 **Table S8.** L\* a\* b\*(CIELAB) color space of previous work

189

|    | Lignin type            | Whitening Strategy      | L*    | $\Delta E$ | Ref. |
|----|------------------------|-------------------------|-------|------------|------|
| 1  |                        |                         | 88.6  | 1.27       |      |
| 2  | Kraft lignin           | Isocyanate modification | 89.72 | 1.82       | [1]  |
| 3  |                        |                         | 88.59 | 1.46       |      |
| 4  |                        |                         | 82.48 | 50.8       |      |
| 5  | Kraft lignin           | Isocyanate modification | 74.13 | 21.5       | [2]  |
| 6  |                        |                         | 70.41 | 28.8       |      |
| 7  |                        |                         | 77.9  | 29.2       |      |
| 8  | Kraft lignin           | Isocyanate modification | 78.1  | 27.4       | [3]  |
| 9  |                        |                         | 76.6  | 28.2       |      |
| 10 | Biomass-derived lignin | Lignin-first strategy   | 71.53 | 26.5       | [4]  |

|    |                           |                                        |       |       |      |
|----|---------------------------|----------------------------------------|-------|-------|------|
| 11 | Ethanol-extracted lignin  | Ultrasound-assisted ethanol extraction | 65.63 | 43.7  | [5]  |
| 12 | Alkali lignin             | Nanoparticle formation                 | 51.01 | 44.5  | [6]  |
| 13 | Kraft/Organosolv          | Morphology control                     | 49.03 | 29.4  | [7]  |
| 14 |                           |                                        | 71.6  | 35.5  |      |
| 15 | Various lignins           | Structural analysis study              | 66.8  | 36.8  | [8]  |
| 16 |                           |                                        | 55.1  | 47.8  |      |
| 17 | Kraft lignin              | Microsphere fabrication                | 61.68 | 36.8  | [9]  |
| 18 | Organosolv lignin         | Cosolvent fractionation                | 37.69 | 63.81 | [10] |
| 19 | DES lignin                | Ternary DES extraction                 | 62.96 | 33    | [11] |
| 20 | Formic acid/phenol lignin | FA/phenol + ultrasound                 | 80.2  | 29.3  | [12] |
| 21 | Modified lignin           | $\alpha$ -carbon methoxy substitution  | 73.0  | 25.2  | [13] |
| 22 | Pine lignin               | Phenolation + p-TsOH                   | 72.3  | 16.4  | [14] |
| 23 | Bamboo lignin             | p-TsOH + THFA                          | 86.1  | 19.2  | [15] |
| 24 | Ultrafiltration lignin    | Membrane fractionation                 | 85.02 | 18.9  | [16] |
| 25 | DES lignin                | Controlled depolymerization            | 88.3  | 3.86  | [17] |
| 26 | Catechyl lignin           | Isocyanate modification                | 79.54 | 12.3  | [18] |

190  
191  
192  
193  
194  
195  
196  
197  
198  
199  
200  
201  
202  
203

**Table S9. Summary of trend-level correlations across multi-modal characterization.**

| Category              | Parameter                | Measurement         | Trend | Nature of Evidence |
|-----------------------|--------------------------|---------------------|-------|--------------------|
| Chemical conversion   | Hydroxyl consumption     | <sup>31</sup> P NMR | ↑     | Direct             |
| Radical signature     | EPR intensity            | EPR (DI)            | ↓     | Direct             |
| Electronic absorption | 400–600 nm area          | UV–vis              | ↓     | Direct             |
| Emissive states       | PL intensity             | PL                  | ↓     | Direct             |
| Optical property      | L*                       | CIELAB color space  | ↑     | Direct             |
| Optical stability     | Radical growth (in situ) | UV–EPR              | ↓     | Direct             |

| Category               | Parameter      | Measurement   | Trend | Nature of Evidence |
|------------------------|----------------|---------------|-------|--------------------|
| Interfacial modulation | Hydrophobicity | Contact angle | ↑     | Supporting         |

204

205

206 **Table S10. The transmittance and haze of films produced by the previous work**

207

|    | Transmittance (%) | Haze (%) | Ref.     |
|----|-------------------|----------|----------|
| 1  | 92.24             | 13       | [19]     |
| 2  | 78                | 22       | [20]     |
| 3  | 80                | 32       | [21]     |
| 4  | 43                | 30       | [22]     |
| 5  | 49                | 35       | [23]     |
| 6  | 68                | 28       | [24]     |
| 7  | 62                | 30       | [25]     |
| 8  | 70                | 13       | [26]     |
| 9  | 85                | 64.4     | [27]     |
| 10 | 72                | 69       | [28]     |
| 11 | 85                | 93       | [29]     |
| 12 | 75                | 70       | [30]     |
| 13 | 78                | 62       | [31]     |
| 14 | 59                | 97       | [32]     |
| 15 | 44                | 65       | [33]     |
| 16 | 87                | 50       | Our work |
| 17 | 83                | 65       | Our work |
| 18 | 80                | 80       | Our work |
| 19 | 78                | 90       | Our work |

208

209

210 Reference

211 [1] K. Shikinaka, Y. Otsuka, Functional “permanently whitened” lignin synthesized via  
212 solvent-controlled encapsulation, *Green Chemistry* 24(8) (2022) 3243-3249.

213 <https://doi.org/10.1039/D1GC04810D>.

214 [2] S. Gao, X. Chen, G. Tian, et al., Preparation of light-colored bio-based particles by  
215 isocyanate-modified lignins and its application for tetracycline adsorption, *International*

216 *Journal of Biological Macromolecules* 253 (2023) 127107.

217 <https://doi.org/https://doi.org/10.1016/j.ijbiomac.2023.127107>.

218 [3] J. Zheng, L. Chen, X. Qiu, Y. Liu, Y. Qin, Structure investigation of light-colored lignin  
219 extracted by Lewis acid-based deep eutectic solvent from softwood, *Bioresource*

220 *Technology* 385 (2023) 129458.

221 <https://doi.org/https://doi.org/10.1016/j.biortech.2023.129458>.

222 [4] Z. Pan, Y. Li, Z. Zhang, et al., Fractionation of light-colored lignin via lignin-first  
223 strategy and enhancement of cellulose saccharification towards biomass valorization,

224 *Industrial Crops and Products* 186 (2022) 115173.

225 <https://doi.org/https://doi.org/10.1016/j.indcrop.2022.115173>.

226 [5] X. Su, Y. Fu, Z. Shao, et al., Light-colored lignin isolated from poplar by ultrasound-  
227 assisted ethanol extraction: Structural features and anti-ultraviolet and anti-oxidation

228 activities, *Industrial Crops and Products* 176 (2022) 114359.

229 <https://doi.org/https://doi.org/10.1016/j.indcrop.2021.114359>.

230 [6] H. Zhang, F. Chen, X. Liu, S. Fu, Micromorphology Influence on the Color Performance  
231 of Lignin and Its Application in Guiding the Preparation of Light-colored Lignin

232 Sunscreen, ACS Sustainable Chemistry & Engineering 6(9) (2018) 12532-12540.  
233 <https://doi.org/10.1021/acssuschemeng.8b03464>.

234 [7] H. Zhang, S. Fu, Y. Chen, Basic understanding of the color distinction of lignin and  
235 the proper selection of lignin in color-depended utilizations, International Journal of  
236 Biological Macromolecules 147 (2020) 607-615.  
237 <https://doi.org/https://doi.org/10.1016/j.ijbiomac.2020.01.105>.

238 [8] S.C. Lee, E. Yoo, S.H. Lee, K. Won, Preparation and Application of Light-Colored Lignin  
239 Nanoparticles for Broad-Spectrum Sunscreens, Polymers 12(3) (2020) 699.

240 [9] H. Zhang, X. Liu, S. Fu, Y. Chen, Fabrication of Light-Colored Lignin Microspheres for  
241 Developing Natural Sunscreens with Favorable UV Absorbability and Staining  
242 Resistance, Industrial & Engineering Chemistry Research 58(31) (2019) 13858-13867.  
243 <https://doi.org/10.1021/acs.iecr.9b02086>.

244 [10] Z. Li, L. Chen, X. Qiu, Fractionation of lignin using eco-friendly organic cosolvent  
245 and preparation of light-colored lignin micro-nanoparticles for sustainable natural  
246 sunscreens, Industrial Crops and Products 208 (2024) 117857.  
247 <https://doi.org/https://doi.org/10.1016/j.indcrop.2023.117857>.

248 [11] C. Lu, J. Xu, J. Xie, et al., Preparation, characterization of light-colored lignin from  
249 corn stover by new ternary deep eutectic solvent extraction, International Journal of  
250 Biological Macromolecules 222 (2022) 2512-2522.  
251 <https://doi.org/https://doi.org/10.1016/j.ijbiomac.2022.10.035>.

252 [12] Y. Wu, X. Chen, S. Ni, et al., Extracting light-colored lignin with high phenolic-OH  
253 from poplar by ultrasonic-assisted formic acid/phenol treatment to prepare transparent

254 lignin/cellulose composite film, International Journal of Biological Macromolecules 309  
255 (2025) 142840. <https://doi.org/https://doi.org/10.1016/j.ijbiomac.2025.142840>.

256 [13] S. Hua, S. Fu, B. Zhang, H. Liu, K. Xu, Methoxy substitution in the  $\alpha$ -carbon of lignin  
257 side-chain inhibits its condensation for light-colored lignin extraction, International  
258 Journal of Biological Macromolecules 320 (2025) 145822.  
259 <https://doi.org/https://doi.org/10.1016/j.ijbiomac.2025.145822>.

260 [14] J. Zhang, Z. Tian, X.-X. Ji, F. Zhang, Light-colored lignin extraction by ultrafiltration  
261 membrane fractionation for lignin nanoparticles preparation as UV-blocking sunscreen,  
262 International Journal of Biological Macromolecules 231 (2023) 123244.  
263 <https://doi.org/https://doi.org/10.1016/j.ijbiomac.2023.123244>.

264 [15] H. Kong, X. Chen, S. Ni, et al., Targeted phenolation and rapid extraction of light-  
265 colored lignin from pine using nucleophilic reagent in combination with acid hydrotrope  
266 p-TsOH, Industrial Crops and Products 229 (2025) 120965.  
267 <https://doi.org/https://doi.org/10.1016/j.indcrop.2025.120965>.

268 [16] S. Wang, M.-F. Li, Efficient extraction of light-colored lignin from bamboo by p-  
269 toluenesulfonic acid assisted tetrahydrofurfuryl alcohol aqueous solution, International  
270 Journal of Biological Macromolecules 282 (2024) 136723.  
271 <https://doi.org/https://doi.org/10.1016/j.ijbiomac.2024.136723>.

272 [17] K. Shikinaka, A. Suzuki, Y. Otsuka, Substituent Effect on Physical Properties of  
273 Whitening Lignin, ChemistrySelect 9(26) (2024) e202400046.  
274 <https://doi.org/https://doi.org/10.1002/slct.202400046>.

275 [18] S. Su, Q. Shen, S. Wang, G. Song, Discovery, disassembly, depolymerization and  
276 derivatization of catechyl lignin in Chinese tallow seed coats, International Journal of  
277 Biological Macromolecules 239 (2023) 124256.  
278 <https://doi.org/https://doi.org/10.1016/j.ijbiomac.2023.124256>.

279 [19] X. Li, J. Li, X. Shen, et al., Transparent Cellulose/Lignin Composite Films with  
280 Adjustable Haze and UV-Blocking Performance for Light Management, ACS Sustainable  
281 Chemistry & Engineering 12(14) (2024) 5427-5435.  
282 <https://doi.org/10.1021/acssuschemeng.3c07076>.

283 [20] Q. Gu, T.L. Eberhardt, J. Shao, H. Pan, Preparation of an oxyalkylated lignin-g-  
284 polylactic acid copolymer to improve the compatibility of an organosolv lignin in  
285 blended poly(lactic acid) films, Journal of Applied Polymer Science 139(16) (2022)  
286 52003. <https://doi.org/https://doi.org/10.1002/app.52003>.

287 [21] S.Y. Park, J.-Y. Kim, H.J. Youn, J.W. Choi, Utilization of lignin fractions in UV resistant  
288 lignin-PLA biocomposites via lignin-lactide grafting, International Journal of Biological  
289 Macromolecules 138 (2019) 1029-1034.  
290 <https://doi.org/https://doi.org/10.1016/j.ijbiomac.2019.07.157>.

291 [22] Q. Xing, D. Ruch, P. Dubois, L. Wu, W.-J. Wang, Biodegradable and High-  
292 Performance Poly(butylene adipate-co-terephthalate)-Lignin UV-Blocking Films, ACS  
293 Sustainable Chemistry & Engineering 5(11) (2017) 10342-10351.  
294 <https://doi.org/10.1021/acssuschemeng.7b02370>.

295 [23] Q. Xing, P. Buono, D. Ruch, et al., Biodegradable UV-Blocking Films through Core-  
296 Shell Lignin-Melanin Nanoparticles in Poly(butylene adipate-co-terephthalate), ACS

297 Sustainable Chemistry & Engineering 7(4) (2019) 4147-4157.  
298 <https://doi.org/10.1021/acssuschemeng.8b05755>.

299 [24] X. Gu, J. Hou, S. Ai, Effect of silane modified nano-SiO<sub>2</sub> on the mechanical properties  
300 and compatibility of PBAT/lignin composite films, Journal of Applied Polymer Science  
301 139(18) (2022) 52051. <https://doi.org/https://doi.org/10.1002/app.52051>.

302 [25] B. Lin, C. Li, F. Chen, C. Liu, Continuous Blown Film Preparation of High Starch  
303 Content Composite Films with High Ultraviolet Aging Resistance and Excellent  
304 Mechanical Properties, Polymers, 2021, p. 3813.

305 [26] X. Zhang, W. Liu, D. Yang, X. Qiu, Biomimetic Supertough and Strong Biodegradable  
306 Polymeric Materials with Improved Thermal Properties and Excellent UV-Blocking  
307 Performance, Adv. Funct. Mater. 29(4) (2019) 1806912.  
308 <https://doi.org/https://doi.org/10.1002/adfm.201806912>.

309 [27] X. Wang, H. Guo, Z. Lu, et al., Lignin Nanoparticles: Promising Sustainable Building  
310 Blocks of Photoluminescent and Haze Films for Improving Efficiency of Solar Cells, ACS  
311 Applied Materials & Interfaces 13(28) (2021) 33536-33545.  
312 <https://doi.org/10.1021/acami.1c08209>.

313 [28] H. Ye, Y. He, H. Li, T. You, F. Xu, 3D-Printed Polylactic Acid/Lignin Films with Great  
314 Mechanical Properties and Tunable Functionalities towards Superior UV-Shielding,  
315 Haze, and Antioxidant Properties, Polymers 15(13) (2023) 2806.

316 [29] W. Zhang, X. Zhang, S. Ren, et al., Lignin containing cellulose nanofiber based  
317 nanopapers with ultrahigh optical transmittance and haze, Cellulose 30(9) (2023) 5967-  
318 5985. <https://doi.org/10.1007/s10570-023-05244-2>.

319 [30] T. Zheng, L. Yang, X.-F. Zhang, J. Yao, Conversion of corncob residue to sustainable  
320 lignin/cellulose film with efficient ultraviolet-blocking property, *Industrial Crops and*  
321 *Products* 196 (2023) 116517.  
322 <https://doi.org/https://doi.org/10.1016/j.indcrop.2023.116517>.

323 [31] Y. Jeon, K. Lee, Y. Seo, et al., Lignin-tailored lignocellulose nanofiber films for light  
324 management using a deep eutectic solvent, *Chemical Engineering Journal* 520 (2025)  
325 165989. <https://doi.org/https://doi.org/10.1016/j.cej.2025.165989>.

326 [32] J. Li, X. Zhang, J. Zhang, et al., Direct and complete utilization of agricultural straw  
327 to fabricate all-biomass films with high-strength, high-haze and UV-shielding  
328 properties, *Carbohydrate Polymers* 223 (2019) 115057.  
329 <https://doi.org/https://doi.org/10.1016/j.carbpol.2019.115057>.

330 [33] R. Nizamov, J. Kaschuk, Y. Al Haj, et al., Optical assessment of lignin-containing  
331 nanocellulose films under extended sunlight exposure, *Cellulose* 32(9) (2025) 5321-  
332 5334. <https://doi.org/10.1007/s10570-025-06380-7>.

333  
334
